# Supplementary material
Source: PubMed Central journal article supplement (PMC3569515)
Supplement: NIHMS339786-supplement-1.pdf [file NIHMS339786-supplement-1.pdf]

**Table S1.** Properties of sIPSCs and mIPSCs in CA1 Neurons from WT, *Pkr*<sup>-/-</sup> and WT Slices Treated with PKRi (Mean ± SEM), Related to Figure 3

|                           | <b>Rise Time 10%-90%<br/>(ms)</b> | <b>Time constant (ms)</b> |
|---------------------------|-----------------------------------|---------------------------|
| <b>sIPSCs</b>             |                                   |                           |
| WT                        | 1.70 ± 0.09                       | 23.29±1.01                |
| <i>Pkr</i> <sup>-/-</sup> | 1.66 ± 0.08                       | 22.35±0.62                |
| PKRi                      | 1.68 ± 0.18                       | 22.89±0.78                |
| <b>mIPSCs</b>             |                                   |                           |
| WT                        | 1.41 ± 0.1                        | 20.60 ± 1.02              |
| <i>Pkr</i> <sup>-/-</sup> | 1.38 ± 0.06                       | 21.15 ± 0.81              |
| PKRi                      | 1.36 ± 0.07                       | 21.28 ± 1.24              |
